# Supplementary material
Source: Springer Nature journal article supplement (https://www.springermedizin.de/resource/supplementary/12874_2011_686_MOESM1_ESM.pdf/9432394)

**1A**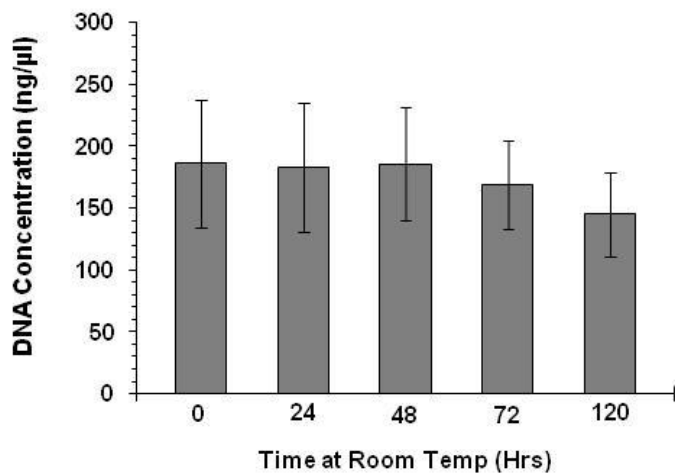**1B**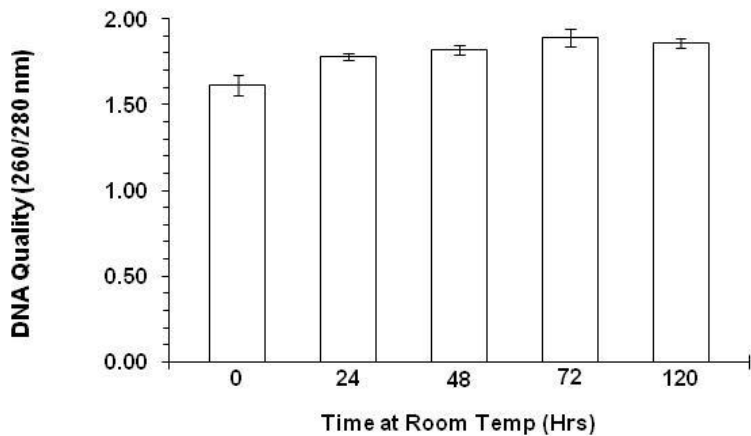

Supplement: MOESM1 [file 9432394]
